# Supplementary material
Source: MDPI journal article supplement (https://www.mdpi.com/2073-4352/11/10/1154)
Supplement: s1 [file s1]

# Donor-Type Nickel–Dithiolene Complexes Fused with Bulky Cycloalkane Substituents and Their Application in Molecular Conductors

Kazuya Kubo <sup>1,\*</sup>, Mamoru Sadahiro <sup>1</sup>, Sonomi Arata <sup>1</sup>, Norihisa Hoshino <sup>2</sup>, Tomofumi Kadoya <sup>1</sup>, Tomoyuki Akutagawa <sup>2</sup>, Reizo Kato <sup>3</sup> and Jun-ichi Yamada <sup>1</sup>

<sup>1</sup> Graduate School of Science, University of Hyogo, 3-2-1, Kouto, Kamigori-cho, Akou-gun, Hyogo 678-1297, Japan; g1127sm@gmail.com (M.S.); rinrin520sono48@gmail.com (S.A.); kadoya.t@sci.u-hyogo.ac.jp (T.K.); yamada@sci.u-hyogo.ac.jp (J.-i.Y.)

<sup>2</sup> Institute of Multidisciplinary Research for Advanced Materials, Tohoku University, 2-1-1 Katahira, Aoba-ku, Sendai, Miyagi 980-8577, Japan; norihisa.hoshino.b5@tohoku.ac.jp (N.H.); akutagawa@tohoku.ac.jp (T.A.)

<sup>3</sup> RIKEN, 2-1 Hirosawa, Wako-shi, Saitama 351-0023, Japan; reizo@riken.jp

\* Correspondence: kubo@sci.u-hyogo.ac.jp; Tel.: +81-791-58-0163

## Supporting Information

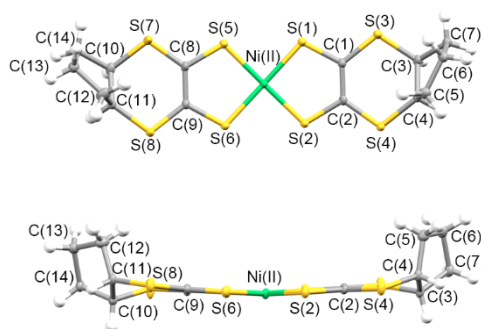

**Figure S1.** Molecular structure of **10** along vertical and parallel directions with atom labels.

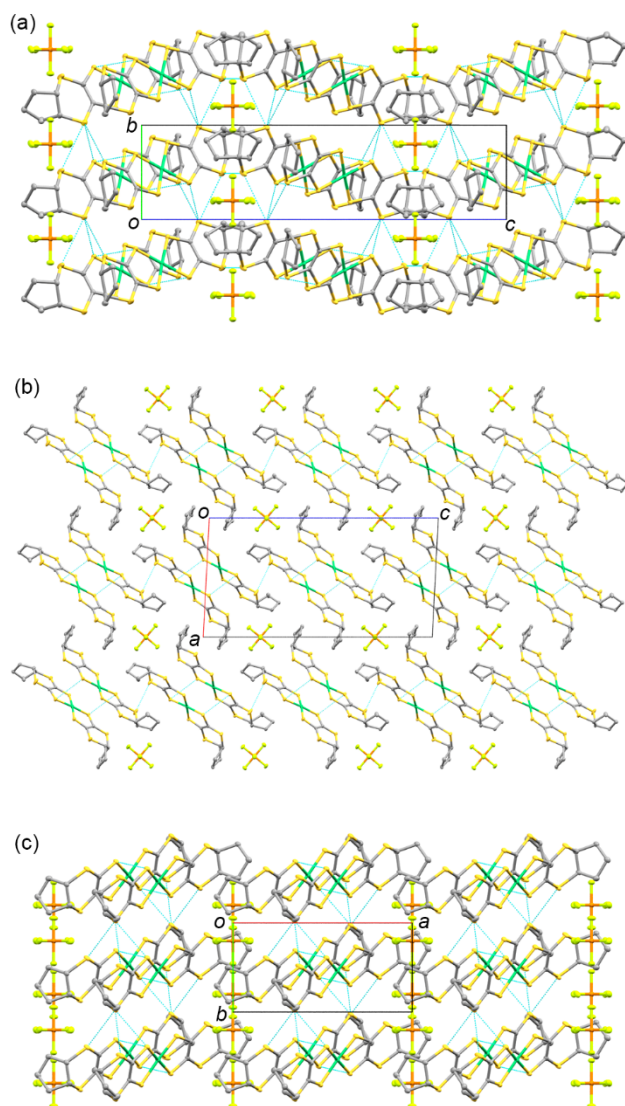

**Figure S2.** Crystal structure of **10** along (a) the *a*, (b) *b*, and (c) *c* axes. Hydrogen atoms are omitted for clarity. Dashed lines indicate sulfur-sulfur distances shorter than the sum of the van der Waals radius ( $< 3.70 \text{ \AA}$ ).

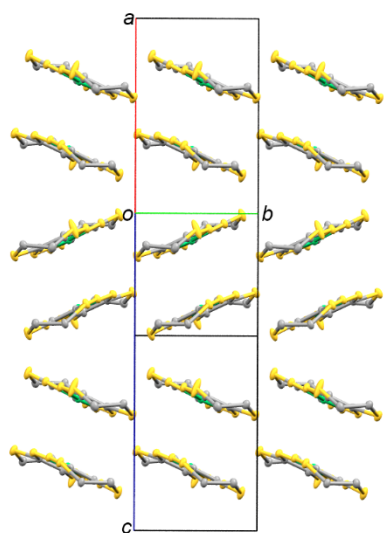

**Figure S3.** Molecular arrangement of the  $[\text{Ni}(\text{dddt})_2]$  moiety of the donor molecules in Crystal **9** viewed along the end-on direction.
